# Supplementary material for: MicroRNA-30c-5p ameliorates hypoxia-reoxygenation-induced tubular epithelial cell injury via HIF1α stabilization by targeting SOCS3
Source: PubMed Central journal article supplement (PMC5696223; doi:10.18632/oncotarget.21582), 2017-10-06
Supplement: oncotarget-08-92801-s001.pdf [file oncotarget-08-92801-s001.pdf]

# MicroRNA-30c-5p ameliorates hypoxia-reoxygenation-induced tubular epithelial cell injury via HIF1 $\alpha$ stabilization by targeting SOCS3

## SUPPLEMENTARY MATERIALS

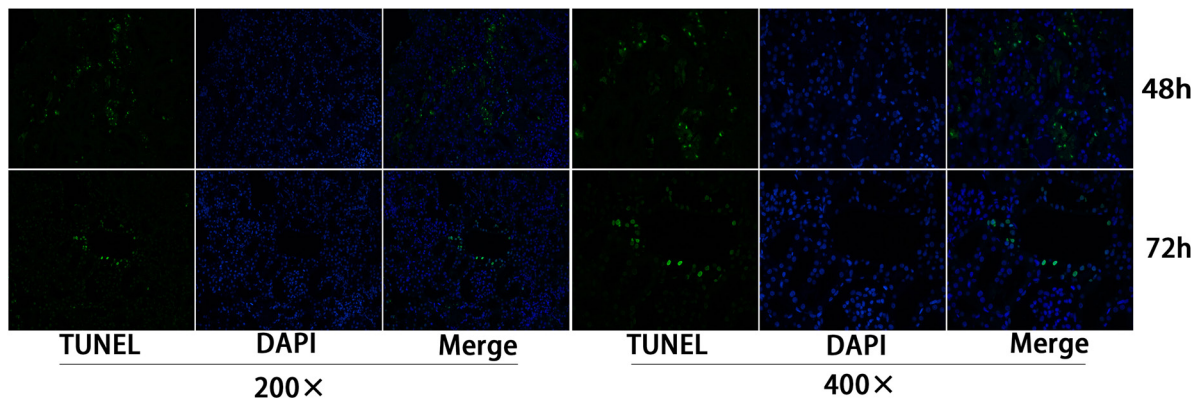

**Supplementary Figure 1: Apoptosis of renal tubular epithelia cells was induced in ischemia/reperfusion animal model.** TUNEL staining results showed that apoptosis was detected at 48-72 h post operation.

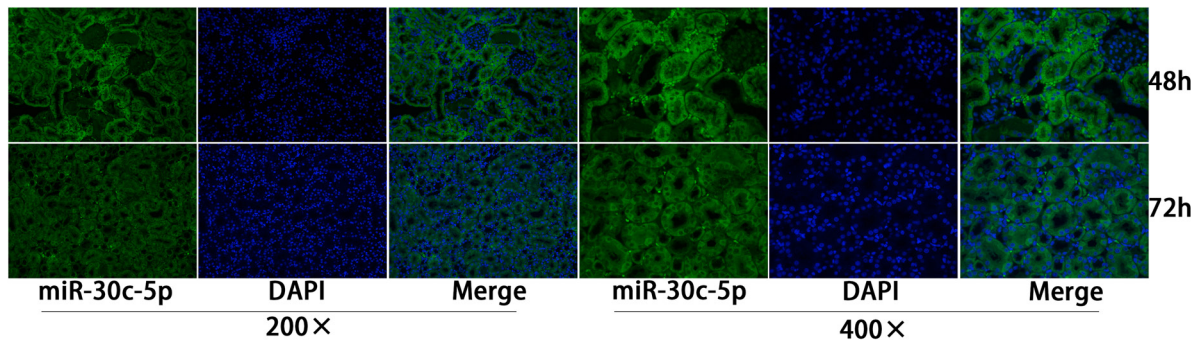

**Supplementary Figure 2: MiR-30c-5p was elevated in the ischemia/reperfusion animal model.** *In situ* hybridization was performed to examine miR-30c-5p expression levels in the kidney cortexes. MiR-30c-5p levels were detected in the renal tubular and the tubule-interstitial cells at 48-72 h post operation.

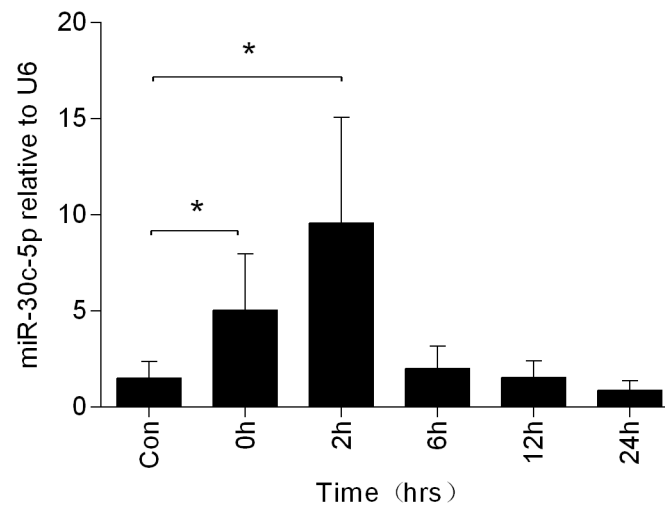

**Supplementary Figure 3: MiR-30c-5p was elevated in cellular H/R injuries.** Quantitative PCR was performed to examine the miR-30c-5p expression levels in the HK2 cell model. The miR-30c-5p expression levels were elevated at 0-2 h after reoxygenation. The data are expressed as the mean±S.E.M, n=3, \* $P < 0.05$ , compared with the control group.

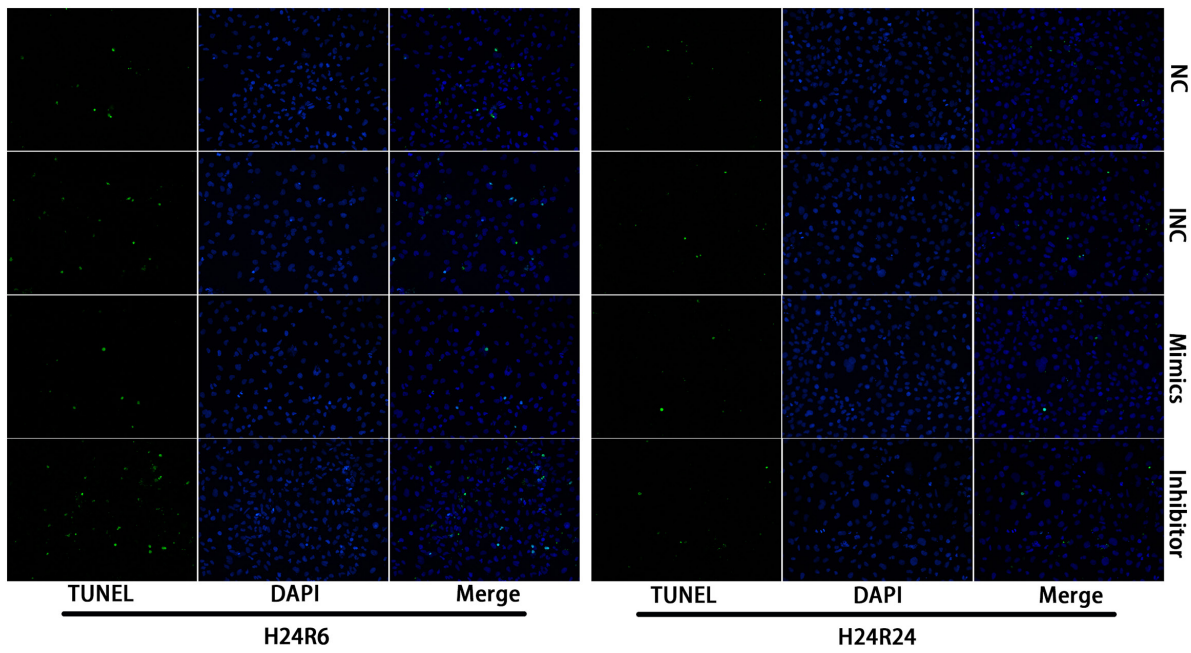

**Supplementary Figure 4: MiR-30c-5p was shown to reduce apoptosis in cellular H/R injuries.** TUNEL staining showed that apoptosis decreased in the mimics group at the 6-h and 24-h time points.

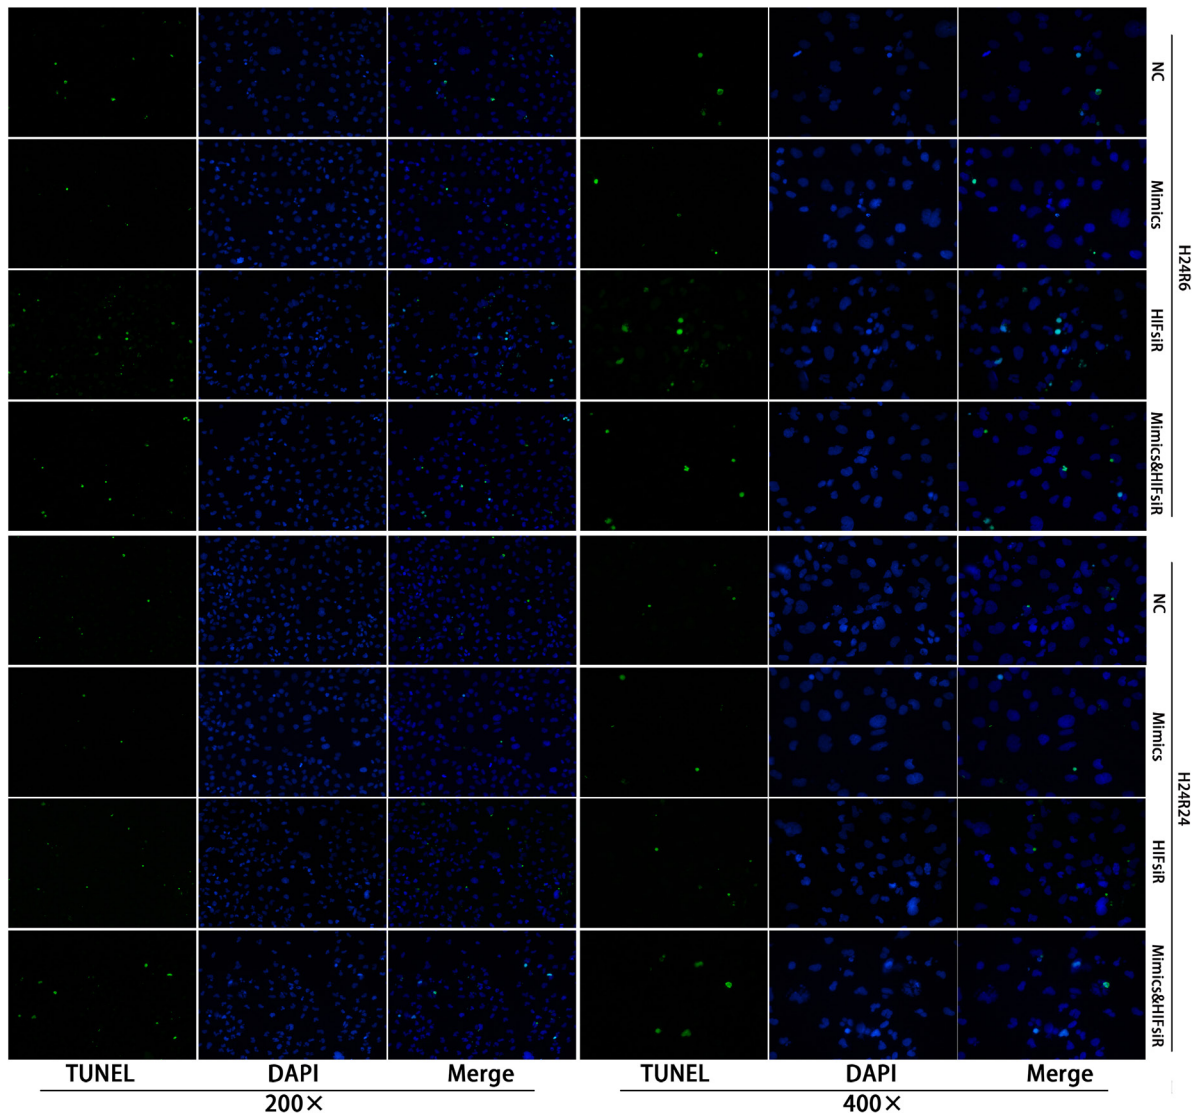

**Supplementary Figure 5: HIF1 $\alpha$  was critical for the anti-apoptosis effects of miR-30c-5p.** TUNEL staining indicated that apoptosis decreased in the mimics group and increased significantly in the HIFsiR group and the Mimics&HIFsiR group.
